1 Genomic consequences of a recent three-way admixture in supplemented wild brown trout  
2 populations revealed by ancestry tracts

3  
4 Maeva LEITWEIN<sup>1</sup>, Pierre-Alexandre GAGNAIRE<sup>1</sup>, Erick DESMARAIS<sup>1</sup>, Patrick BERREBI<sup>1</sup> and Bruno  
5 GUINAND<sup>1,2</sup>

6  
7 Addresses:

8 <sup>1</sup>: ISEM, CNRS, Univ. Montpellier, IRD, EPHE, Montpellier, France

9 <sup>2</sup>: Département Biologie-Ecologie, Université de Montpellier, Place Eugène Bataillon, 34095  
10 Montpellier Cedex 5, France

11

12 Running title:

13 Genome-wide admixture through ancestry tracts

14

15 Key words: Introduced populations, hybridization, introgression, chromosomal ancestry,

16 *Salmo trutta*

17

18 Corresponding Author:

19

20 Maeva Leitwein

21 ISEM-Institut des Sciences de l'Evolution

22 *UMR5554*

23 Place Eugène Bataillon – C.C. 065

24 *Université Montpellier*

25 *34095 Montpellier cedex 05*

26 *France*

27 Tel.: +33 467143725;

28 email: [maeva.leitwein.pro@gmail.com](mailto:maeva.leitwein.pro@gmail.com)

29 Abstract

30 Understanding the evolutionary consequences of human-mediated introductions of domestic  
31 strains into the wild and their subsequent admixture with natural populations is of major  
32 concern in conservation biology. In the brown trout *Salmo trutta*, decades of stocking  
33 practices have profoundly impacted the genetic makeup of wild populations. Small local  
34 Mediterranean populations in the Orb River watershed (Southern France) have been subject to  
35 successive introductions of domestic strains derived from the Atlantic and Mediterranean  
36 lineages. However, the genomic impacts of two distinct sources of stocking (locally-derived  
37 vs divergent) on the genetic integrity of wild populations remain poorly understood. Here, we  
38 evaluate the extent of admixture from both domestic strains within three wild populations of  
39 this watershed, using 75,684 mapped SNPs obtained from double-digest restriction-site-  
40 associated DNA sequencing (dd-RADseq). Using a local ancestry inference approach, we  
41 provide a detailed picture of admixture patterns across the brown trout genome at the  
42 haplotype level. By analysing the chromosomal ancestry profiles of admixed individuals, we  
43 reveal a wider diversity of hybrid and introgressed genotypes than estimated using classical  
44 methods for inferring ancestry and hybrid pedigree. In addition, the length distribution of  
45 introgressed tracts retained different timings of introgression between the two domestic  
46 strains. We finally reveal opposite consequences of admixture on the level of polymorphism  
47 of the recipient populations between domestic strains. Our study illustrates the potential of  
48 using the information contained in the genomic mosaic of ancestry tracts in combination with  
49 classical methods based on allele frequencies for analysing multiple-way admixture with  
50 population genomic data.

51

52

53

## Introduction

54 From the early 1950's, hybridization has been associated to intentional or  
55 unintentional disturbance of natural systems by human activities (Anderson 1948, 1949, 1953;  
56 Anderson and Stebbins 1954; Wiegand 1935). Since then, human-mediated hybridization  
57 (HMH) between source and recipient populations has become an increasingly significant eco-  
58 evolutionary concern in conservation biology (Levin *et al.*, 1996; Rhymer and Simberloff,  
59 1996). Despite the continued technical improvements in the analysis of hybridization and  
60 admixture, the debate about the costs and benefits of HMH is still ongoing (e.g., Bohling,  
61 2016; Wayne and Shaffer, 2016; Grabenstein and Taylor, 2018). On the one hand,  
62 hybridization can be a source of beneficial evolutionary novelties through adaptive  
63 introgression (Anderson, 1949; Stebbins, 1950; Anderson and Stebbins, 1954; Heiser, 1951;  
64 Whitney *et al.*, 2015; Schumer *et al.*, 2014; Yakimowski and Rieseberg, 2014; Lamichhaney  
65 *et al.*, 2017; Runemark *et al.*, 2018). On the other hand, hybridization can erase diversity  
66 resulting from speciation and natural selection, leading to genetic swamping and loss of local  
67 adaptation (e.g. Laikre *et al.*, 2010; Randi, 2008; Rhymer and Simberloff, 1996; Todesco *et*  
68 *al.*, 2016). The emerging view offered by genome-wide surveys is that HMH often results in a  
69 mix of positive and negative effects that are scattered across the genome, leading to the  
70 “haplotype block view” of hybridization introducing adaptive and maladaptive “*blocks of*  
71 *genic materials belonging to different adaptive systems*” (Anderson and Stebbins 1954).

72 This ‘genic block’ metaphor referred to what is now coined as local ‘ancestry tracts’  
73 resulting from multigenerational gene flow and recombination events among hybridizing taxa  
74 (Buerkle and Lexer, 2008; Gravel, 2012; Gompert and Buerkle, 2013; Liu *et al.*, 2013; Liang  
75 and Nielsen, 2014). The identification of ancestry tracts is based on the analysis of marker  
76 associations in admixed individuals with the goal of recovering continuous ancestry blocks  
77 inherited from ancestral taxa, sometimes including explicitly linkage information (e.g. Price *et*  
78 *al.*, 2009; Lawson *et al.*, 2012; Loh *et al.*, 2013; Zhou *et al.*, 2017). The number and the  
79 length distribution of such tracts are informative (i) on the admixture level and variation at  
80 both a global (i.e. the relative ancestry proportions of each admixed individual; Buerkle,  
81 2005) and local genomic scale (or locus-specific; i.e. the ancestry of each haplotype at a  
82 particular locus; Falush *et al.*, 2003), but also (ii) on the number of generations since initial  
83 admixture because recombination progressively breaks down ancestry tracts across  
84 generations (e.g. Pool and Nielsen, 2009; Gravel, 2012; Corbett-Detig and Nielsen, 2017).

85 The use of ancestry tracts has helped understanding the history of admixture during the recent  
86 and past history of human populations, including admixture between modern human and  
87 extinct archaic lineages (e.g., Wall *et al.*, 2013; Racimo *et al.*, 2015). More recently, these  
88 approaches have been also applied in domesticated plant and animal species to characterize  
89 the nature, origin and timing of introgression (e.g. VonHoldt *et al.*, 2016; Hufford *et al.*, 2013;  
90 Flori *et al.*, 2014; Galaverni *et al.*, 2017; Nelson *et al.*, 2017; Medugorac *et al.*, 2017; Wang *et*  
91 *al.*, 2017). The development of next-generation sequencing (NGS) technologies together with  
92 statistical development and associated softwares (a review in Johnson *et al.*, 2015) has offered  
93 an unprecedented way to study admixture and introgression in many hybridizing taxa  
94 including both model and non-model species (Kohn *et al.*, 2006; Primmer, 2009; Allendorf *et*  
95 *al.*, 2010; Ouborg *et al.*, 2010; Angeloni *et al.*, 2012; Narum *et al.*, 2013; Steiner *et al.*, 2013;  
96 Hoffmann *et al.*, 2015). However, the use of local ancestry blocks to characterize the genomic  
97 landscape of admixture remains scarce in conservation genomic studies (but see VonHoldt *et*  
98 *al.*, 2016; Galaverni *et al.*, 2017; Duranton *et al.*, 2017).

99 Because of their important socio-economic status, salmonids are amongst the most  
100 worldwide anthropized fish families (Antunes *et al.*, 1999; Fraser, 2008; Davidson *et al.*,  
101 2010). Stocking practices and enhancement using hatchery fishes are common in Salmonids  
102 (Antunes *et al.*, 1999; Aprahamian *et al.*, 2003; Sundt-Hansen *et al.*, 2015) and often result in  
103 gene flow between domestic and wild populations, which becomes a central issue to many  
104 conservation programs (Waples, 1991; Naish *et al.*, 2007; Fraser, 2008; Harbicht *et al.*, 2014;  
105 Skaala *et al.*, 2014; Glover *et al.*, 2017). The impacts of HMH on neutral genetic diversity  
106 (e.g. Laikre *et al.* 2010; Fernández-Cebrián *et al.* 2014), adaptation (e.g. McGinnity *et al.*,  
107 2003; Muhlfeld *et al.*, 2009; Le Cam *et al.*, 2015) and genetic integrity of recipient  
108 populations (e.g. Eldridge *et al.*, 2009; Valiquette *et al.* 2014; Ozerov *et al.*, 2016) have been  
109 assessed using molecular markers, but without using linkage information. Now that extensive  
110 genomic resources are available including dense linkage maps (e.g. Lien *et al.*, 2011;  
111 Gagnaire *et al.*, 2013; Gonen *et al.*, 2014; Briec *et al.*, 2014; McKinney *et al.*, 2015;  
112 Sutherland *et al.*, 2016; Tsai *et al.*, 2016; Leitwein *et al.*, 2017) and reference genomes  
113 (Berthelot *et al.*, 2014; Lien *et al.*, 2016), it becomes possible to explore the potential of local  
114 ancestry blocks for studying the genomic consequences of HMH in salmonids.

115 The brown trout (*Salmo trutta* L.) is a widely distributed Eurasian species with a  
116 complex evolutionary history (Elliott, 1994; Bernatchez and Osinov, 1995; Sanz, 2017). The

117 species has been heavily impacted by human activities and is subject to stocking practices that  
118 are known to genetically impact wild populations to various degrees (e.g. Poteaux *et al.*,  
119 1999; Berrebi *et al.*, 2000; Almodóvar *et al.*, 2001; Hansen, 2002; Hansen *et al.*, 2009). In  
120 France, the Atlantic hatchery lineage which has been domesticated for decades (Bohling *et*  
121 *al.*, 2016) has been largely used for restocking and enhancement of wild Mediterranean local  
122 populations that belong to a distinct evolutionary lineage (e.g. Bernatchez 2001). In order to  
123 avoid mixing different lineages by supplementing with the domestic Atlantic strain, several  
124 recent attempts have been made to develop local domestic Mediterranean strains with the aim  
125 to release locally adapted genotypes into the wild (Bohling *et al.* 2016). However, the impacts  
126 of these different stocking practices have not been assessed at the genomic level yet.

127 The aim of this study was to investigate admixture from a distantly (i.e. Atlantic) and a  
128 closely (i.e. Mediterranean) related hatchery source strain into wild Mediterranean brown  
129 trout populations. We assessed the mosaic of introgressed tracts for characterizing the  
130 complex makeup of admixed genotypes within three wild brown trout populations, and  
131 improve the distinction between ‘early-generation hybrids’ such as F<sub>1</sub>, F<sub>2</sub> and backcrosses,  
132 and ‘late-generation hybrids’ produced by several generations of admixture in the wild.  
133 Finally, the relative timing of admixture was estimated from both domestic source  
134 populations within each of the three wild populations. We took advantage of the high-density  
135 linkage map recently developed by Leitwein *et al.* (2017) to address these issues using RAD  
136 markers.

137

## 138 Materials and methods

### 139 *Sampling*

140 Wild Mediterranean brown trout were sampled from three tributaries of the Orb River  
141 watershed in southern France (April-May 2015). Eighty-two individuals were caught by  
142 electrofishing, fin clipped and released under the supervision of the Hérault French Fishing  
143 Federation. The study includes a total of 23 individuals from the upper Orb River, 45 from the  
144 Gravezon River, and 14 from the Mare River (Table 1). Farmed fish (N = 102) were sampled  
145 in 2014 at the Babeau hatchery to genetically characterize each of the two domestic strains  
146 that were used for stocking. They consisted of 61 individuals from the Atlantic domestic

147 strain, which is commonly used for stocking practices in France for decades (Bohling *et al.*  
148 2016), and 41 individuals from a Mediterranean domestic strain, which was initially  
149 developed by the Hérault French Fishing Federation in 2004 (Table 1). The Mediterranean  
150 domestic strain was founded exclusively with individuals from the Gravezon River (Hérault  
151 French Fishing Federation, *pers. comm.*). Additional information on the stocking of Atlantic  
152 brown trout in France and sampling are provided in Bohling *et al.* (2016) and Leitwein *et al.*  
153 (2016), respectively. Sixty individuals (including both farmed and wild) of the 184 analyzed  
154 in this study were part of a previous study describing genome-wide patterns of nucleotide  
155 diversity in Atlantic and Mediterranean brown trout lineages using dd-RAD-seq (Leitwein *et*  
156 *al.* 2016).

**Table 1** Number of individuals sampled for the hatchery strain and wild population (*N*) along with the number of individuals after filtering for missing data (*N<sub>filtered</sub>*) and the number of individuals considered as pure domestic or pure wild with ADMIXTURE (*N<sub>pure</sub>*) see text for details.

| Samples                | labels | <i>N</i> | <i>N<sub>filtered</sub></i> | <i>N<sub>pure</sub></i> |
|------------------------|--------|----------|-----------------------------|-------------------------|
| Hatchery strain        |        |          |                             |                         |
| Cauteret (Atlantic)    | ATL    | 61       | 54                          | 54                      |
| Babeau (Mediterranean) | domMED | 41       | 40                          | 40                      |
| River Orb              |        |          |                             |                         |
| La Mare                | Mare   | 14       | 14                          | 4                       |
| Gravezon               | Grav   | 45       | 45                          | 15                      |
| Upper Orb              | Orb    | 23       | 23                          | 10                      |
| Total                  |        | 184      | 176                         | 123                     |

157

158

### 159 *DNA extraction and sequencing*

160 Individual genomic DNA was extracted from caudal fin clips using the commercial  
161 KingFisher Flex Cell and Tissues DNA Kit. DNA quantity and quality were evaluated using  
162 both NanoDrop ND-8000 spectrophotometer (Thermo Fisher Scientific) and Qubit 1.0  
163 Fluorometer (Introgen, Thermo Fisher Scientific). The double digested restriction site-  
164 associated DNA (dd-RAD) library preparation protocol followed Leitwein *et al.* (2016).  
165 Briefly, the two restriction enzymes *EcoRI*-HF and *MspI* were used to digest individual  
166 genomic DNA, which was subsequently submitted to adaptor ligation (one with unique

167 barcodes for each individual and one common to 48 individuals containing Illumina index).  
168 Each library consisting of 48 individuals with unique barcodes pooled in equimolar  
169 proportions was fragmented and submitted to size selection to retain fragments ranging from  
170 200 to 700bp using CleanPCR beads. The library was then amplified by PCR and sequenced  
171 with Illumina HiSeq2500, producing 125bp paired-end reads.

172

### 173 *Genotyping*

174 The bioinformatics pipeline used for SNP calling has been described in Leitwein *et al.*  
175 (2016). Briefly, reads were demultiplexed, cleaned and trimmed to 120bp using  
176 `process_radtags.pl` implemented in `STACKS` v1.35 (Catchen *et al.*, 2013). Individual genotypes  
177 at RAD markers were determined using a reference mapping approach with the Atlantic  
178 salmon genome taken as a reference (GenBank accession number:  
179 GCA\_000233375.4\_ICASASG\_v2; Lien *et al.*, 2016). The `BWA_mem` program v. 0.7.9 (Li and  
180 Durbin, 2010) was used to align reads along *S. salar* genome before calling SNPs for each  
181 individual with the `pstacks` module (using  $m = 3$  and the bounded error model with  $\alpha =$   
182 0.05). We used a previously established reference RAD catalogue constructed by Leitwein *et*  
183 *al.* (2016, 2017) (`--catalog` in the `cstacks` module). Each of the 184 individuals was  
184 then matched against this catalogue with `sstacks`. Seven domestic Atlantic and one  
185 domestic Mediterranean individuals were removed because of high percentage of missing  
186 data (>20%), resulting in a final data set of 176 individuals (82 wild Mediterranean  
187 individuals, 54 Atlantic and 40 Mediterranean domestic individuals). Finally, the  
188 `populations` module was used to generate a genotype dataset in VCF and PLINK formats  
189 containing loci passing the following filters: (i) a minimum stacks depth of 5 reads; (ii) a  
190 genotype call rate of at least 80% within each of the five populations, (iii) a minimum allele  
191 frequency of 2%, and (iv) a maximum observed heterozygosity of 60%. A single  
192 representative of each overlapping site was kept with the option `--ordered_export` in  
193 `STACKS`.

194

### 195 *Inference of admixture and hybridization*

196 We used the filtered dataset containing 86,175 SNPs to estimate individual cluster  
197 membership using ADMIXTURE v1.3 (Alexander *et al.*, 2009). This program provides an  
198 estimation of individual ancestry proportions from  $K$  different source populations (clusters)  
199 that are inferred from the data. Since we aimed at detecting genetic admixture between wild  
200 individuals and two different domestic strains, ADMIXTURE was run separately for each the  
201 three wild populations (Mare, Gravezon and Orb), along with the Atlantic and Mediterranean  
202 domestic strains, with a  $K$  value of 3. Bar plots of estimated ancestry proportions given by the  
203  $Q$ -values estimates by ADMIXTURE were produced with R v. 3.4.3. (Team, 2015).

204 We used the NEWHYBRIDS v2.0 software (Anderson and Thompson, 2002) to assign  
205 individual genotypes to Atlantic and Mediterranean parental lineages and different hybrid  
206 pedigrees (including F1 and F2 hybrids, and first generation backcrosses (BC) in each  
207 direction) in each of the three rivers. Domestic Atlantic individuals ( $N = 54$ ) and wild  
208 individuals with a Mediterranean ancestry greater than 95% ( $N = 29$  individuals:  $N_{\text{Mare}} = 4$ ,  
209  $N_{\text{Orb}} = 10$ ,  $N_{\text{Gravezon}} = 15$ ; Table 1) were considered as pure parental references for the Atlantic  
210 and Mediterranean lineages, respectively, using parental priors with the  $z$  and  $s$  options. We  
211 only used the most informative SNPs between these parental reference populations to increase  
212 the detection efficiency of hybrid categories. In total, 196 SNPs with a Weir and Cockerham's  
213  $F_{\text{ST}} > 0.85$  were retained to run NEWHYBRIDS using 50,000 iterations after 100,000 burn-in  
214 steps.

215

### 216 *Inference of local ancestry*

217 The inference of local ancestry was performed with ELAI v1.01 (Guan, 2014), which  
218 relies on a two-layer hidden Markov model to detect the structure of haplotypes in unrelated  
219 individuals. The program was run separately for each of the 40 linkage groups (LG) of the *S.*  
220 *trutta* linkage map (Leitwein *et al.*, 2017). We took advantage of the strong collinearity  
221 between the *Salmo trutta* and *S. salar* genomes (Leitwein *et al.*, 2017) to anchor the 4,000  
222 mapped RAD loci of the brown trout linkage map onto the reference genome of *S. salar*. This  
223 strategy allowed us to determine the relative mapping positions of a large number of  
224 additional RAD loci that were not present on the brown trout linkage map, using their relative  
225 positions on the Atlantic salmon reference genome. A list of ordered RAD loci was created  
226 for each of the 40 brown trout LGs, and passed to the STACKS populations module using the



227 whitelist option (-W) with the previously described filters to generate an ELAI input file for  
228 each brown trout LG. ELAI was run separately for each wild Mediterranean population. In  
229 each run, we used the 54 Atlantic and the 40 Mediterranean domestic individuals as source  
230 populations, and also used wild individuals with a Mediterranean ancestry greater than 95%  
231 (N = 29; Table 1) as a third source population. The number of upper clusters (-C) was set to 3  
232 (i.e. because wild fish potentially originated from up to three source populations: domestic  
233 Atlantic, domestic Mediterranean and wild Mediterranean), the number of lower clusters (-c)  
234 to 15 (i.e. 5C, as in Guan 2014), the number of admixture generations (-mg) to 10 (i.e.  
235 approximately corresponding to the beginning of stocking), and the number of expectation-  
236 maximization steps (-s) to 20. The ancestral allele dosage from a given source population (see  
237 below) at each SNP was finally plotted for each individual along each LG to generate  
238 ancestry profiles with R (Team, 2014).

239

#### 240 *Estimation of tract length and chromosomal ancestry imbalance*

241 The junctions between haplotypes originating from different source populations were  
242 identified from the analysis of individual ancestry profiles produced by ELAI, as illustrated in  
243 Figure 1. At each variable position, we conservatively considered as evidence for 0, 1 or 2  
244 haplotype copies from a given source when the inferred ancestry dosage was within the range  
245 [0, 0.05], [0.95, 1.05], or [1.95, 2], respectively (Figure 1A). Therefore, the junctions between  
246 haplotypes from different sources occurred within ‘uncertainty areas’ where the ancestry  
247 dosage lays between 0.05 and 0.95, or between 1.05 and 1.95. For each ‘uncertainty area’  
248 within each LG of each individual, the junction between the ending and starting positions of  
249 two haplotypes from different sources was determined as the position where the estimated  
250 ancestry-dosage curve produced by ELAI crossed the 0.5 or 1.5 values (Figure 1A).

251

252 Because the approach implemented here with ELAI does not use phased haplotype data,  
253 the delimitation of tract junctions could not be unambiguously resolved in the particular case  
254 when the ancestry dosage was found to vary from 1 to 2 and back to 1 haplotype copy (Figure  
255 1A). Such profiles may correspond to two alternatives situations, one involving the co-  
256 occurrence of a short haplotype inherited from one parent, fully overlapping a long haplotype

257 inherited from the other parent (case a) in Figure 1A), and the second involving the presence  
 258 of two medium-sized and partially overlapping haplotypes (case b) in Figure 1A). Although it  
 259 is not possible distinguishing between these two alternatives, we systematically resolved these  
 260 cases by considering the existence of one short and one long haplotype, in order to avoid  
 261 over-splitting real long haplotypes in early-generation hybrids, which would artificially  
 262 downwardly bias our estimates of chromosomal ancestry imbalance (see below). This choice  
 263 is also consistent with the know history of uninterrupted stocking practices over the last  
 264 decades, generating combinations of short (i.e. more ancient) and long (i.e. more recent)  
 265 haplotypes originating from the same source within individual genotypes.

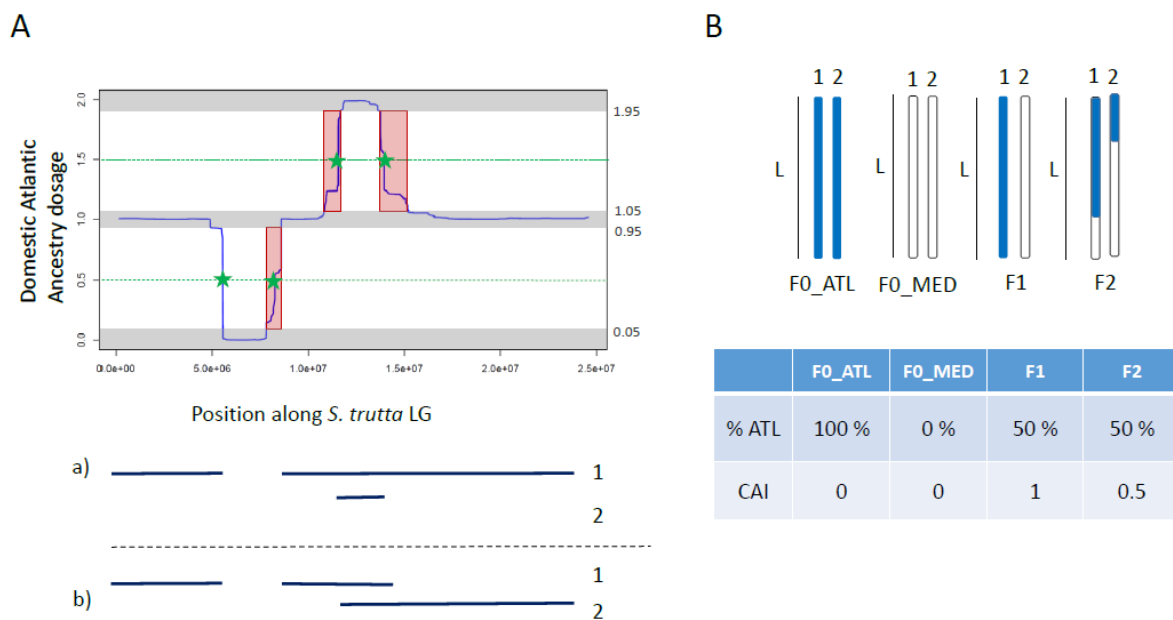

**Figure 1** Detection of the haplotypic origin along each LG of brown trout with ELAI (Guan, 2014). The left panel (A) represent one individual output provided by ELAI, in which the ancestry dosage (0, 1, 2) of the Atlantic haplotype is represented as a function of the position along *Salmo trutta* LG in bp. Horizontal grey zone represent the 0.05 confidence interval of ancestry dosage. Green stars represent the junctions between the ending and the starting position of each Atlantic haplotype. Red boxes represent the uncertainty areas (see text for details). On this left panel, (a) and (b) represent the two concurrent interpretations of haplotypic structure along each homologue (1 and 2). Each interpretation satisfies the description of variation in Atlantic allelic dosage presented above. The right panel (B) describes the theoretical expectations of the percentage of domestic Atlantic haplotypes and the chromosome ancestry imbalance (CAI) for: F0\_ATL: pure domestic Atlantic homologues with the Atlantic ancestry represented in blue, F0\_MED: wild Mediterranean, F1: hybrids resulting from a crossing between two pure parental population (F0\_MED and F0\_ATL), and F2: theoretical hybrids resulting from a crossing between two F1 individuals. The percentage of Atlantic ancestry of each individual represent the sum of all Atlantic haplotypes length divided by the chromosomal length (L). The CAI represent the difference of cumulated Atlantic haplotype length between the two parental homologues (1 and 2) divided by the haploid chromosomal length (L).

266

267           The identification of tract junctions allowed retrieving the number and length of tracts  
268 originating from each of the three source populations for each of the 40 LGs of each  
269 individual. Haplotypes lengths were then summed per origin across LGs and divided by the  
270 diploid genome size to estimate individual ancestry proportions from domestic Atlantic,  
271 domestic Mediterranean and wild Mediterranean sources. In order to evaluate the consistency  
272 of admixture proportions estimated using SNP frequencies and haplotype lengths, we tested  
273 the correlation between the levels of admixture estimated with ADMIXTURE and ELAI using  
274 Spearman test in R (Team, 2014). We further tested whether the percentage of individual  
275 domestic ancestry from each domestic source correlates with the genome-wide averaged  
276 heterozygosity computed with VCFtools v0.1.14 (Danecek *et al.*, 2011).

277

#### 278 *Quantifying the timing of hybridization and introgression*

279           In order to characterize the dilution of Atlantic alleles within Mediterranean genomes  
280 over time, we defined the chromosomal ancestry imbalance (CAI, Figure 1B). For a given  
281 chromosome, the CAI represents the difference between the cumulated lengths of Atlantic  
282 haplotypes from each of the two parental homologues, divided by the haploid chromosome  
283 length. Therefore, the CAI ranges from 0 to 1, and can be averaged across the 40 LGs to  
284 provide a genome-wide measure for each individual. The CAI theoretically reaches its  
285 maximal value of 1 for F1 hybrids obtained by crossing two pure (i.e. non-admixed) parental  
286 populations, and is progressively reduced at every generation post-admixture due to  
287 recombination and random transmission of homologues from one generation to the next.  
288 Therefore, the CAI converges to 0 after a sufficient number of generations post admixture.  
289 The value of 0 also characterizes pure individuals (e.g., F0\_ATL and F0\_MED, Figure 1B).

290           The length distribution of tracts originating from the two domestic sources was used to  
291 estimate the timing of hybridization in each of the 3 wild populations. Following (Racimo *et*  
292 *al.*, 2015), the relationship between the time since admixture ( $T$  in generations) and the mean  
293 length of introgressed tracts ( $l$ ) is given by:

$$294 \qquad T = 1 + [l(1 - m)r]^{-1} \qquad \text{(eqn. 1)}$$

295 where  $m$  is the proportion of domestic ancestry within the recipient population, and  $r$  the  
296 recombination rate (in Morgan per base pair per generation). We used the genome-wide  
297 average recombination rate estimated in Leitwein *et al.* (2017), taking into account its  
298 variation across the genome to account for uncertainty. The mean tract length ( $l$ ) in eqn. 1 was  
299 replaced by the *mode* of the length distribution of domestic tracts (either of Atlantic or  
300 Mediterranean origin). The rationale behind that choice was that the mode of the distribution  
301 better reflects the average time when the intensity of stocking was the most important,  
302 whereas the mean of the distribution would instead capture the presence of long tracts in early  
303 generation hybrids (Figure S1). Thus, using the mode of the distribution for estimating the  
304 timing of hybridization was considered more realistic to obtain conservation relevant  
305 estimates in this study. Individuals identified as ‘pure’ F0 individuals were discarded prior to  
306 building the length distributions of Atlantic and Mediterranean domestic tracts.

307

## 308 Results

### 309 *SNP calling*

310 A total of 1.5 billion of demultiplexed raw reads resulting in an average of 8.76  
311 million reads per individuals were retained for the STACKS analysis. The previously  
312 established RAD catalogue (Leitwein *et al.* 2016) based on 64 individuals was updated using  
313 the 176 individuals considered in this study. After applying quality and population filters, we  
314 finally retained for subsequent analyses a total of 86,175 SNPs from 45,435 RAD loci, with a  
315 mean coverage depth of  $47.7 \pm 17.9X$  per SNP per individuals and a percentage of missing  
316 genotypes of  $4.20 \pm 2.9\%$  per individuals.

317

### 318 *Clustering analysis*

319 The ADMIXTURE program identified the three expected groups ( $K = 3$ ) for each run  
320 performed separately for each wild population, including the domestic Atlantic and  
321 Mediterranean strains along with the wild populations considered in each run (either  
322 Gravezon, Orb or Mare; Figure 2). In the Gravezon River, 6 individuals were assigned as pure  
323 domestic Atlantic fish, and several individuals found with a 50% domestic Atlantic and a 50%  
324 wild Mediterranean ancestry were probably F1 hybrids. In the Orb River, the program found

325 overall low proportions of domestic ancestries from either Atlantic or Mediterranean strains.  
326 In the Mare River, four individuals had more than 50% of Mediterranean domestic ancestry,  
327 and no putative Atlantic/Mediterranean F1 individual was detected, as in the Orb River.  
328 Moreover, each of the three ADMIXTURE runs revealed that the Atlantic domestic strain  
329 displays a low proportion of Mediterranean ancestry, with consistent estimates of individual  
330 admixture proportions among runs (Figure 2).

331

332 The numbers of pure, F1, F2 and first generation backcrosses between Atlantic and  
333 Mediterranean lineages present in each wild population were estimated with NEWHYBRIDS.  
334 Despite setting priors on parental samples, two Atlantic individuals from the hatchery were  
335 not assigned to the parental Atlantic lineage, indicating possible admixture in their recent  
336 ancestry (Table S1). Similarly, two individuals from the Orb, one from Gravezon and four  
337 from Mare River were not assigned as ‘pure’ wild individuals despite being defined as  
338 parental individuals in the prior settings (Table S1). According to NEWHYBRIDS, hybrid  
339 genotypes were present in all of the three wild populations, including seven F1’s in the  
340 Gravezon River, and four, three and five F2’s in the Orb, Gravezon and Mare rivers,  
341 respectively (all with  $\geq 95\%$  probability of assignment, Table S1). First generation backcross  
342 genotypes were mostly detected in the Orb River with NEWHYBRIDS (Table S1).

343

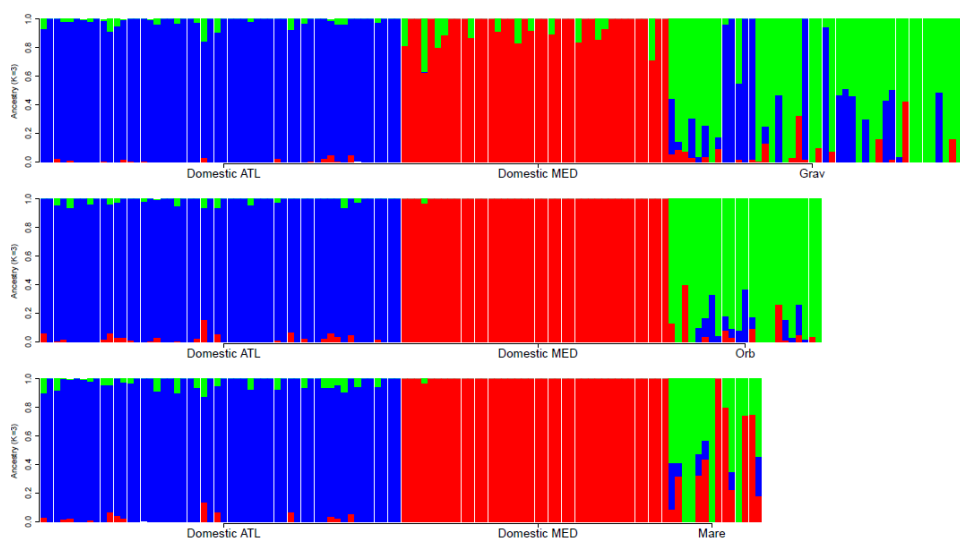

**Figure 2** Plots of the individual ancestry inference for the 86,175 SNPs present in wild-caught brown trout. Analyses were separately run ( $K = 3$ ) for individuals of the three wild populations (from top to bottom: Gravezon; Orb and Mare populations) using ADMIXTURE v1.3. Each individual is represented by a single vertical line, with colors indicating the estimated ancestry in each of the  $K = 3$  groups: Atlantic domestic strain (blue), Mediterranean domestic strain (red), or wild Mediterranean (green).

344 *Inference of local ancestry*

345         Local ancestry inference was performed in ELAI using 75,684 mapped SNPs  
346 distributed along the forty *S. trutta* LGs for 53 admixed individuals captured in the wild (13  
347 from the Orb, 30 from the Gravezon and 10 from the Mare; Table S2), using individuals  
348 identified as pure domestic (ATL-Dom or MED-Dom) or wild Mediterranean (MED-Wild) as  
349 reference samples. For clarity, Figure 3 provides four examples illustrating the inference of  
350 local ancestry profiles along a LG in individuals with different ancestries. It first shows  
351 (Figure 3, upper left panel) an introgressed Atlantic haplotype of about 3 Mb (ATL-Dom  
352 ancestry dosage = 1) within a wild Mediterranean fish (MED-Wild ancestry dosage = 2).  
353 Then, the upper right panel describes a typical profile of a F1 hybrid resulting from the first  
354 generation of crossing between a pure domestic Atlantic and a pure wild Mediterranean  
355 individual, both contributing to an ancestry dosage of 1 all along the LG. The bottom left  
356 panel illustrates a F1 hybrid resulting from the crossing of a pure domestic Atlantic and a wild  
357 Mediterranean parent introgressed by the Atlantic domestic strain (i.e. resulting in  
358 homozygous Atlantic positions with an ATL-Dom ancestry dosage = 2). The last panel  
359 illustrates the typical profile of a pure domestic Atlantic individual (ATL-Dom ancestry  
360 dosage = 2). In these four selected examples, no signature of domestic Mediterranean  
361 introgression was observed (MED-Dom ancestry dosage = 0).

362         Junctions between adjacent ancestry tracts were generally represented by sharp  
363 transitions in chromosomal ancestry profiles. On average, regions of uncertain ancestry  
364 represented a  $6.54 \pm 5.75\%$  fraction of the genome around domestic Atlantic tracts and a  
365  $12.15 \pm 8.15\%$  fraction around domestic Mediterranean tracts. This result indicates a  
366 reasonably high precision to identify the junctions between adjacent ancestry tracts.

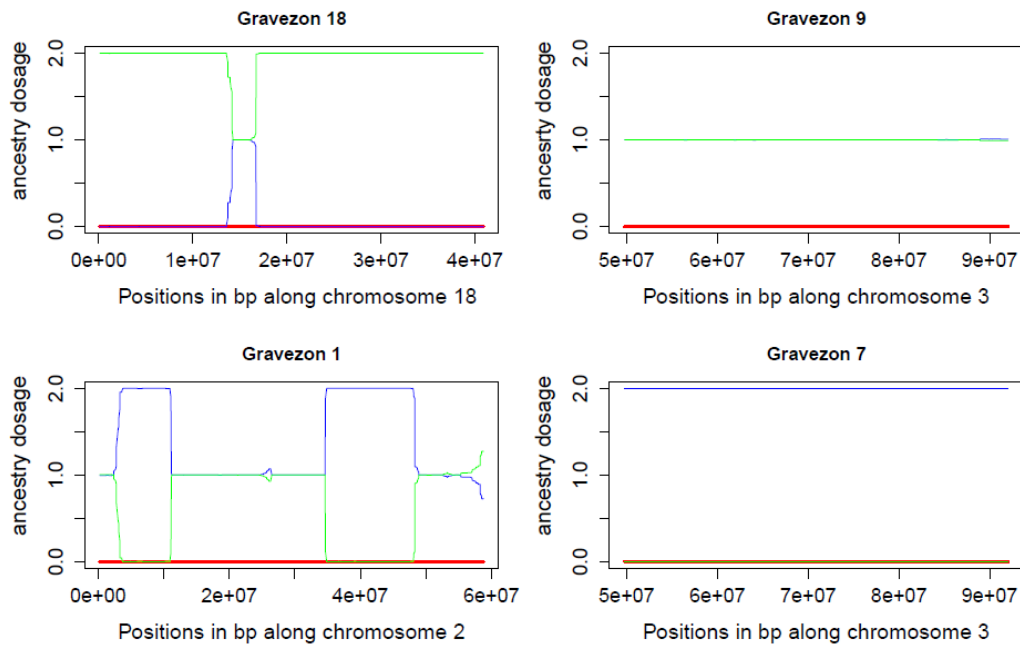

367

368 **Figure 3** Examples of four individual plots of the local ancestry inference run established with ELAI (Guan,  
369 2014). The ancestry dosage (y-axis; see Fig. 1A) is represented along LGs 4, 3 and 2 (x-axis), for four distinct  
370 Gravezon individuals (18, 9, 1 and 7). In green: the wild Mediterranean ancestry, in red: the domestic  
371 Mediterranean ancestry and in blue: the Atlantic domestic ancestry.

372

### 373 *Analysis of hybridization and admixture from local ancestry tracts*

374 Local ancestry patterns were summarized across LGs to determine the total number  
375 and the cumulative length of introgressed haplotypes along the genome of each individual, in  
376 order to provide an estimate of the genome-wide ancestry from each source population. The  
377 number and the mean length of introgressed haplotypes of domestic Atlantic and  
378 Mediterranean ancestry were found to considerably vary among the 53 admixed individuals  
379 considered in this study (Table S2). Within individuals, the length of ancestry tracts was also  
380 highly variable (Table S2), partly because chromosome length (which varies among  
381 chromosomes) influences the length of tracts during the first generations of admixture.  
382 Individual admixture proportions calculated as the percentages of Atlantic and Mediterranean  
383 domestic tracts relative to the total length of chromosomes were found to be significantly  
384 positively correlated to the percentages of domestic ancestry computed with ADMIXTURE  
385 (ATL-Dom:  $\rho_{\text{Spearman}} = 0.95$ ,  $p < 2.2e-16$ ; MED-Dom:  $\rho_{\text{Spearman}} = 0.88$ ,  $p < 2.2e-16$ , Figure  
386 4 A and B). This result confirms that the genome-wide average ancestry estimated with ELAI  
387 is highly consistent with the estimates obtained using the more classical ADMIXTURE approach,

388 despite the existence of a small fraction of ‘uncertainty areas’ where local ancestry could not  
389 be determined. However, ADMIXTURE reported the existence of individuals with no domestic  
390 ancestry – either from Atlantic or Mediterranean strains – that were found with small but non-  
391 negligible domestic ancestries in ELAI (Figure 4). This discrepancy in estimating the  
392 presence/absence of non-admixed individuals in wild populations may be explained by the  
393 tendency of ADMIXTURE to minimize the estimated admixture fraction of the least introgressed  
394 samples.

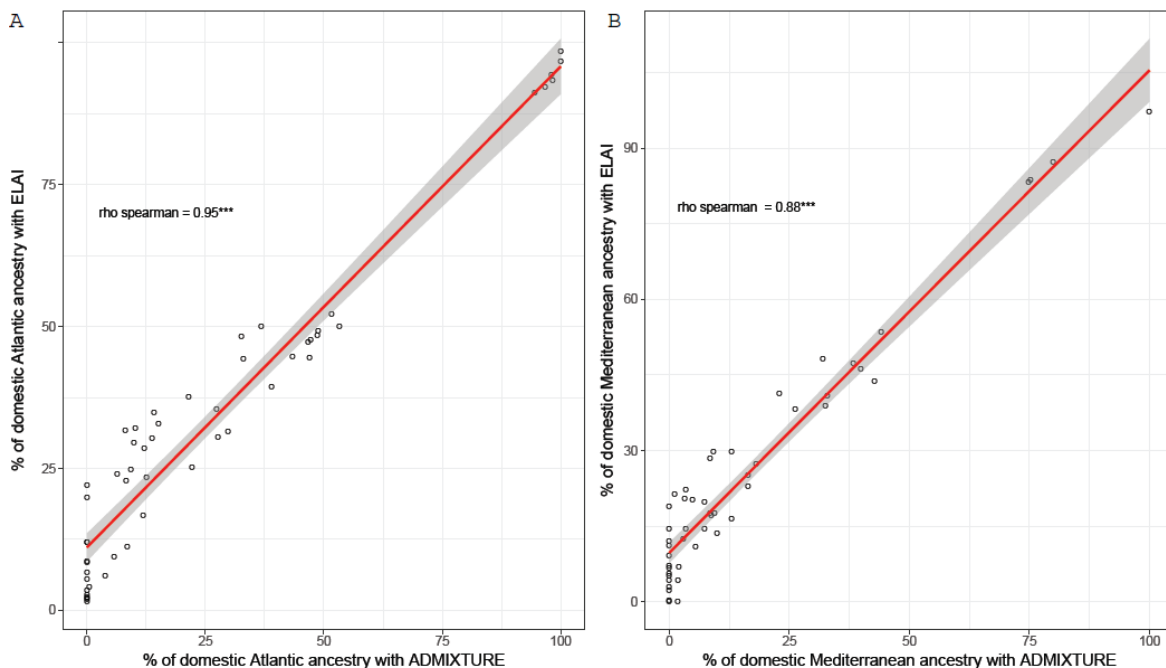

**Figure 4** Positive correlation between the percentage of domestic Atlantic (A) and Mediterranean (B) ancestry computed with ELAI and ADMIXTURE ( $\rho_{\text{spearman}} = 0.95$  and  $0.88$ ,  $p\text{-value} < 2.2e-16$ , respectively)

395

396 We then compared local ancestry patterns among wild individuals in order to  
397 characterize the diversity of admixed genotypes between wild Mediterranean populations and  
398 the more evolutionary distant Atlantic strain. The estimated chromosomal ancestry imbalance  
399 (CAI) was expressed as a function of the percentage of Atlantic ancestry estimated with ELAI  
400 in a triangle plot, together with the number of Atlantic haplotypes (Figure 5). These estimates  
401 were compared to the theoretical expectations that the maximum  $CAI=1$  for F1 hybrids, and  
402  $CAI=0$  for pure Atlantic (ATL-Dom) and Mediterranean (MED-Wild) individuals. Moreover,  
403 the expected number of Atlantic haplotype tracts in pure Atlantic individuals corresponds to



404 the diploid chromosome number ( $2n=80$ ), whereas it is equal to 0 in pure Mediterranean fish.  
405 These theoretical expectations were not totally met by real F1 hybrids and parental samples  
406 (Figure 5), indicating that introgression has occurred in both parental populations (ATL-Dom  
407 and Med-Wild). This was further supported by the results obtained with NEWHYBRIDS based  
408 on 196 SNPs with  $F_{ST} > 0.85$ . Indeed, the parental Atlantic samples identified by  
409 NEWHYBRIDS clustered close to the theoretical position of pure Atlantic parents in the triangle  
410 plot, although they contained more than 80 Atlantic tracts and displayed small fractions of  
411 Mediterranean ancestry (Figure 5). Likewise, fish identified as F1 showed a reduced CAI and  
412 an increased number of Atlantic ancestry tracts compared to what was expected for F1  
413 hybrids produced between non-introgressed parental populations. Discrepancies were also  
414 found to occur for some individuals beyond first hybrid generation. For example, F2  
415 individuals should have similar Atlantic ancestry to F1 hybrids, but an estimated CAI of  $\sim 0.5$   
416 vs  $\sim 1.0$ . Four individuals were found to meet these expectations in Figure 5 (i.e. individuals  
417 with 72, 87, 97 and 98 Atlantic haplotypes located in the center of the triangle plot), three of  
418 which have been assigned as F2 with NEWHYBRIDS. The NEWHYBRIDS analysis further  
419 identified several F2 in the Mare and the Orb rivers (Figure 5), which did not present either a  
420 number of Atlantic haplotypes or an Atlantic ancestry compatible with the expectation of the  
421 F2 category (Figure 5, Table S2). The finding of reduced Atlantic tract numbers and Atlantic  
422 ancestries (down to 55 and 25%, respectively) suggested that these individuals were more  
423 likely backcross genotypes produced between a F2 and a backcross parent. Moreover, two  
424 individuals were assigned as pure wild Mediterranean fish with NEWHYBRIDS (Table S2),  
425 while they appeared to be more likely backcrosses produced between a F1 and a  
426 Mediterranean parent. Indeed, one of them displayed a CAI of 0.49 together with Atlantic  
427 ancestry of 25.3%, which corresponds to what is expected for a first generation backcross.  
428 Therefore, our results probably illustrate some limitation of NEWHYBRIDS to assign genotypes  
429 to predefined hybrid classes in the presence of complex admixtures that go beyond the  
430 categories that are specified prior to the analysis. However, both methods produced mostly  
431 similar results for parental, F1 and F2 classes.

432 The analysis of CAI, estimated percentage of Atlantic ancestry, and estimated number  
433 of Atlantic tracts in wild individuals showed a complete absence of backcross individuals in  
434 the Atlantic genetic background (Figure 5). On the contrary, we found extensive backcrossing  
435 in the opposite direction, with individuals showing CAI and Mediterranean ancestry values  
436 compatible with a range of backcross pedigree beyond the first backcross generation (Figure  
437 5). This was illustrated by a decreasing gradient in CAI, Atlantic ancestry and estimated  
438 number of Atlantic tracts between F2 hybrids and the least introgressed Mediterranean  
439 individuals.

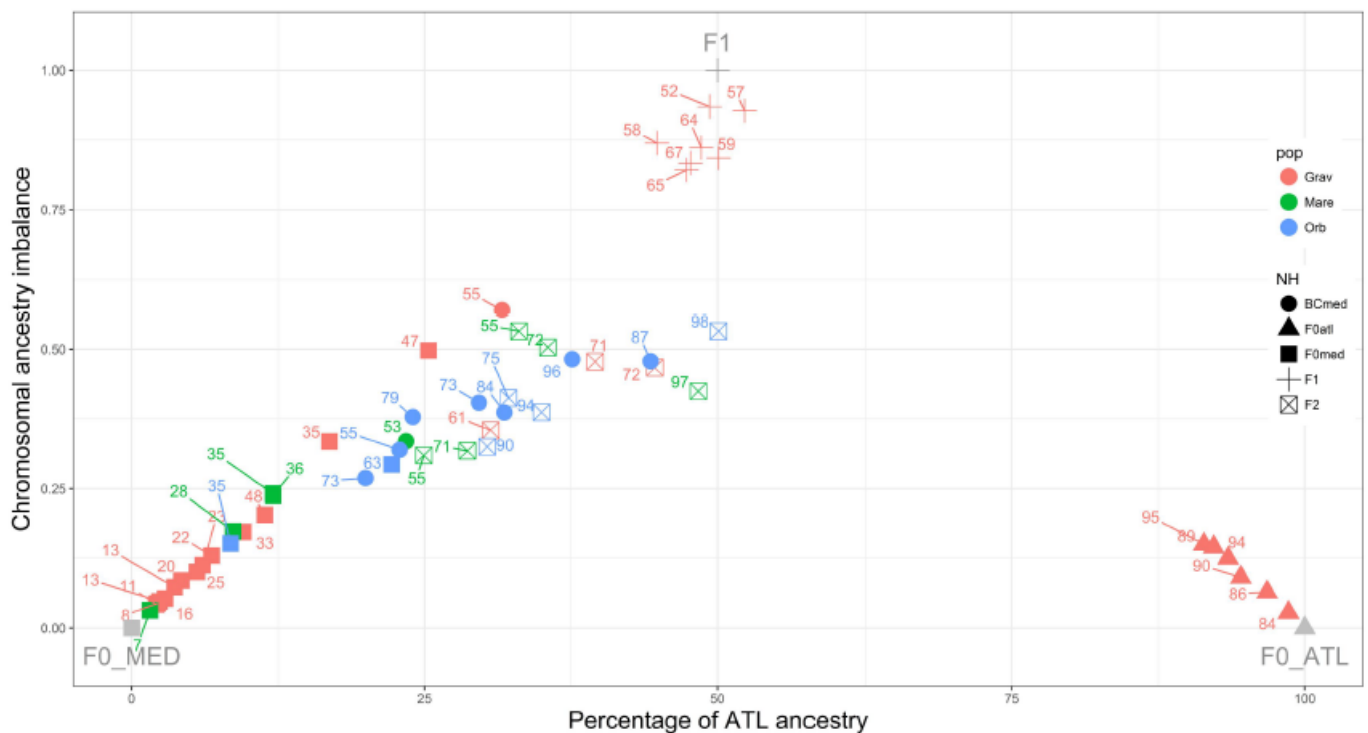

**Figure 5** Plot of the chromosomal ancestry imbalance in function of the percentage of Atlantic ancestry for each wild-caught admixed individual considered. Grey points represent the theoretical expectations for F0\_MED (without Atlantic ancestry, thus a CAI of 0 because individuals are theoretically pure Mediterranean), F0\_ATL (without wild Mediterranean ancestry, thus a CAI of 0 because individuals are theoretically pure Atlantic) and F1 individuals (with half Atlantic ancestry and half wild Mediterranean ancestry, thus a CAI of 1 because the chromosomal ancestry imbalance is maximum between homologues). The colors represent the three wild populations: red for wild-caught individuals of the Gravezon River, then green for the Mare and blue for the Orb individuals, respectively. The different points shape represent the hybrids categories as obtained with NewHybrids. The estimated numbers of Atlantic haplotypic tracts for each individual are reported and ranged from 7 to 98 with theoretical expectation ranging from 0 to 80.

440 The percentage of domestic ancestry was also compared to the individual heterozygosity in  
441 order to evaluate the consequences of admixture and introgression on the level of  
442 polymorphism. We found a significant positive correlation between the percentage of  
443 domestic Atlantic ancestry and individual heterozygosity (Figure 6A,  $\rho_{\text{Spearman}} = 0.88$ ,  $p$   
444  $<2.2\text{e-}16$ ). Conversely, a significantly negative correlation was found between the percentage  
445 of domestic Mediterranean ancestry and individual heterozygosity (Figure 6B,  $r_{\text{Spearman}} = -0.44$ ,  
446  $p < 2.2\text{e-}16$ ).

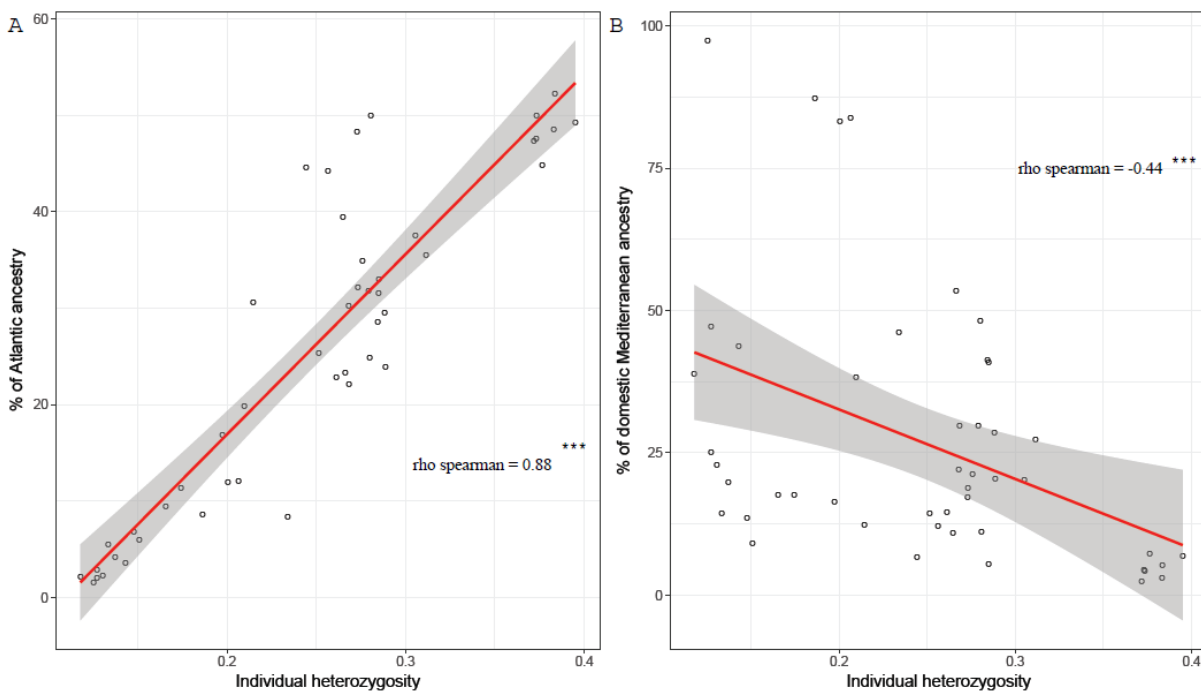

**Figure 6** Correlations between the percentage of domestic ancestry and the individual heterozygosity. (A) Positive correlation between the percentage of domestic Atlantic ancestry ( $\rho_{\text{spearman}}=0.88$ ,  $p\text{-value}<2.2\text{e-}16$ ). (B) Negative correlation between the percentage of domestic Mediterranean ancestry and the individual heterozygosity ( $\rho_{\text{spearman}}=-0.44$ ,  $p\text{-value}<2.2\text{e-}16$ )

447

448

#### 449 *Estimation of time since admixture*

450 In order to estimate the time in generations since the introduction of Atlantic and  
451 Mediterranean domestic haplotypes within each wild Mediterranean population, the mode of  
452 the length distribution of domestic haplotypes was used within each population. The  
453 individuals formerly recognized as “pure” domestic Atlantic (Figure 5, Gravezon’s

454 individuals at the right corner) were removed from data before estimating  $T$ , as well as four  
455 individuals with more than 80% of domestic Mediterranean ancestry identified in the Mare  
456 River (Table S2). The proportions of Atlantic ancestry in each wild population were relatively  
457 close from each other (0.244, 0.228 and 0.299 for the Gravezon, the Mare and the Orb rivers,  
458 respectively). The modes of the estimated length of Atlantic haplotypes were more  
459 heterogeneous across populations (6,533,308 bp, 7,878,364 bp and 5,421,128 bp for the  
460 Gravezon, the Mare and the Orb rivers, respectively) (Figure S2). Considering that the mean  
461 recombination rate was estimated to 0.88cM/Mb in brown trout (Leitwein *et al.* 2017), and  
462 taking in account the recombination rate variation by using the first and the third quartile  
463 estimates of the recombination rate (0.37 cM/Mb and 1.13 cM/Mb, respectively; derived from  
464 Leitwein *et al.*, 2017). The time  $T$  was estimated to 24.01 generations ([18.92-55.73]  
465 generations using the 1<sup>st</sup> and 3<sup>rd</sup> quartiles of the estimated recombination rate) for Gravezon,  
466 19.70 generations ([15.55-45.46] generations) for the Mare and 30.90 generations ([24.28-  
467 72.10] generations) for the Orb (Figure 7)

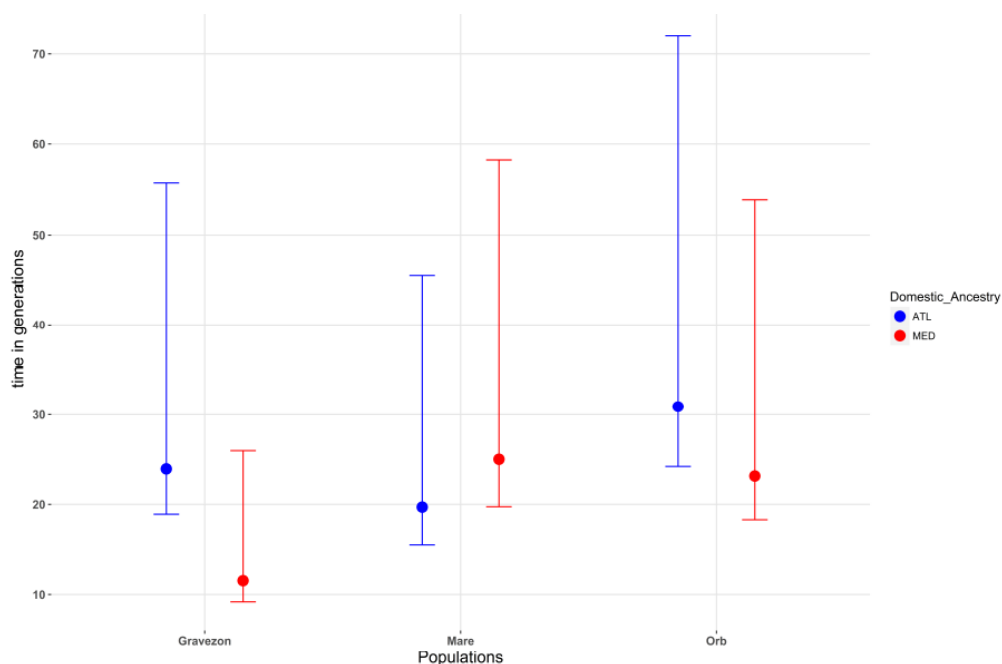

468

469 **Figure 7** Estimates of the number of generations ( $t$ ) since introgression of both Atlantic (in blue) and  
470 Mediterranean (in red) domestic strains in each wild Mediterranean populations. The confidence intervals have  
471 been estimated using the first and third quartiles of recombination rate estimates provided by Leitwein *et al.*  
(2017). See text for details.

471

472 Similarly, we estimated  $T$  for domestic Mediterranean admixture into the wild  
473 populations. The proportions of Mediterranean ancestry in the populations were 0.155, 0.381

474 and 0.242 for the Gravezon, the Mare and the Orb rivers, respectively. The mean lengths of  
475 domestic Mediterranean haplotypes were 12,786,692 bp, 7,633,631 bp and 6,740,239 bp for  
476 the Gravezon, the Mare and the Orb rivers, respectively (Figure S2).  $T$  was estimated to 11.51  
477 generations ([9.19-26.01] generations) for Gravezon, 25.07 generations ([19.75-58.25]  
478 generations) for the Mare and 23.23 generations ([18.31-53.87] generations) for the Orb  
479 (Figure 7).

480

481

482

## Discussion

483 By combining Anderson and Stebbins' (1954) 'genetic blocks' view with population genomic  
484 approaches to characterize a complex three-way admixture, we here provide an improved  
485 description of the genome-wide consequences of human-mediated hybridization in wild  
486 populations of Mediterranean brown trout. In Southern France, as in many other locations  
487 throughout Europe (see Bohling *et al.* 2016), domestic strains derived from different brown  
488 trout evolutionary lineages (Atlantic and Mediterranean; Bernatchez, 2001; Sanz, 2018) were  
489 commonly used for supplementation. The Atlantic domestic trout has been used for decades  
490 to enhance wild Mediterranean populations, but since 2004, this strain was largely replaced  
491 by a local domestic Mediterranean strain developed using wild breeders from the Gravezon  
492 River, for local supplementation. In this study, RAD-derived SNPs were used to provide a  
493 genome-wide picture of individual admixture within each of three wild Mediterranean  
494 populations. We performed local ancestry inference in each individual using 75,684 mapped  
495 SNPs without using phase information, and evaluated the performance of this approach to  
496 estimate genome-wide average ancestry compared to classical ancestry inference methods.  
497 We also compared the percentage of Atlantic ancestry and the chromosomal imbalance for  
498 Atlantic ancestry between homologues across different categories of parental, admixed and  
499 introgressed genotypes. Finally, we used the length distribution of introgressed domestic  
500 haplotypes to estimate the time since the maximum rate of admixture with both the Atlantic  
501 and Mediterranean domestic strains in each local population. We show that admixture had  
502 dramatically different consequences on the level of polymorphism depending on the domestic  
503 source population used for stocking, thus providing important information to future  
504 conservation actions.

505

506 *Tree-way admixture inference*

507 Individual proportions of domestic Atlantic, domestic Mediterranean and wild  
508 Mediterranean ancestry were assessed with ADMIXTURE and ELAI using 86,175 SNPs and  
509 75,684 mapped SNPs, respectively (Figure 2; Table S2). Contrary to microsatellites data that  
510 did not allow the detection of the domestic Mediterranean strain in Gravezon river (Berrebi  
511 and Schikorski, 2017), admixture from the two domestic strains (i.e. Atlantic and  
512 Mediterranean) was efficiently detected in each river using the dense SNP marker dataset.

513 The individual proportions of domestic and wild ancestry assessed with ELAI using the  
514 haplotypic ancestry information showed a high consistency with the ancestry proportions  
515 inferred with ADMIXTURE. Indeed, a strong positive correlation was observed between  
516 ADMIXTURE and ELAI results for both Atlantic and Mediterranean domestic ancestry. Since the  
517 genome-wide ancestry proportions are consistent between methods for both domestic sources,  
518 it reinforces the value of the local ancestry inferences performed with ELAI, which has not yet  
519 been evaluated for its performance on similar data.

520 Both methods found six individuals sampled in the Gravezon River that were assigned  
521 as domestic Atlantic trout. Because the Hérault French Fishing Federation has stopped  
522 supplementing with the domestic Atlantic fish in this region, these individuals were probably  
523 escaped from a private hatchery during flooding events that are frequent in Mediterranean  
524 streams. Besides these six Atlantic fish, a low to moderate percentage (from 10 to 20%) of  
525 domestic Atlantic ancestry was detected in each of the three wild populations. This likely  
526 result from past introgression of Atlantic alleles which starting since the beginning of  
527 supplementation practices. Domestic Mediterranean ancestry was also detected in all three  
528 local populations, especially in the Mare River where four individuals over 14 had a high  
529 percentage of domestic Mediterranean ancestry (>60%), probably due to recent stockings in  
530 this river.

531 Our analyses also revealed discrepancies between methods, especially for estimating  
532 the lowest proportions of admixture within wild individuals. Indeed, ADMIXTURE assigned  
533 several individual as pure (i.e. zero percent of domestic ancestry, Figure 4) whereas ELAI  
534 detected low to moderate proportions of admixture (i.e. 0 to 20 %, Figure 4). This might

535 reflect some limits in the inference of ancestry proportions with ADMIXTURE, which tends to  
536 minimize the level of admixture in the least introgressed genotypes. This discrepancy is also  
537 possibly explained by the fact that ADMIXTURE estimates ancestry proportions globally across  
538 the genome, whereas ELAI performs local ancestry inference. By taking advantage of the  
539 information contained in allelic association at linked markers, ELAI is expected to provide a  
540 finer scale picture of the mosaic of ancestry, which is supposed to improve the estimation of  
541 admixture proportions when introgression occurs over a small fraction of the genome. This  
542 interpretation, however, will need to be confirmed by a simulation study to evaluate the  
543 performance of ELAI in a similar context.

544

#### 545 *Detection of Hybridization*

546 The chromosomal ancestry imbalance (CAI) and the percentage of Atlantic ancestry  
547 estimated from ELAI output were used to characterize admixture between wild Mediterranean  
548 populations and the Atlantic domestic source. The percentage of domestic ancestry is  
549 equivalent to the hybrid index (Anderson, 1949; Buerkle, 2005), and the CAI to the  
550 interspecific heterozygosity, both classically used to infer hybridization patterns at an  
551 individual level (Larson *et al.*, 2013; Gompert and Buerkle, 2016; Wielstra *et al.*, 2017).  
552 However, by using haplotypes and the CAI, we were not limited by the use of only highly  
553 differentiated loci and thus were able to characterize admixture between domestic and wild  
554 Mediterranean populations exhibiting shallow differentiation. Moreover, the number and  
555 length distribution of introgressed tracts reflect the number of recombination events since  
556 hybridization, with a high number of short tracts revealing past introgression and a small  
557 number of long tracts revealing recent admixture (Gravel, 2012; Harris and Nielsen, 2013;  
558 Racimo *et al.*, 2015). These haplotype statistics are therefore more informative than the  
559 interspecific heterozygosity, which is not dependent of the number of generations since  
560 admixture beyond the first hybrid generation. For illustration, more abundant and longer  
561 Atlantic tracts were found in Mediterranean backcrosses compared to introgressed individuals  
562 displaying a low percentage of Atlantic ancestry, and showing less abundant and shorter  
563 Atlantic tracts (Figure 5). This result is consistent with a dilution of the Atlantic tracts over  
564 generations since the beginning of the supplementation history (i.e. supplementation with the  
565 domestic Atlantic strain has been stopped in this region). Moreover, the six ‘pure’ domestic

566 Atlantic individuals which have been found in Gravezon River displayed a number of Atlantic  
567 haplotypes greater than the 80 expected from the diploid number of chromosomes (Leitwein  
568 *et al.*, 2017; Phillips and Ráb, 2001). Along with an estimated percentage of Atlantic ancestry  
569 lower than one hundred percent and a CAI greater than zero, this result indicates a possible  
570 admixture with Mediterranean individuals during the development of the Atlantic domestic  
571 strain. This hypothesis is further comforted by the low percentage of Mediterranean ancestry  
572 detected in the Atlantic domestic population with ADMIXTURE (Figure 2).

573 The use of haplotypic information provides a more detailed picture of recent  
574 hybridization and its consequences on admixture and introgression than NEWHYBRIDS  
575 (Anderson and Thompson, 2002), which can only assign individual genotypes to discrete  
576 predefined hybrid classes (e.g. typically parental, F1, F2, and first generation backcrosses).  
577 For example, several individuals in Gravezon, Mare and Orb rivers were assigned as pure  
578 Mediterranean by NEWHYBRIDS (F0med; Figure 5), while their percentage of Atlantic  
579 ancestry ranged from 8 to 32 %, with a number of Atlantic tracts ranging from 11 to 63  
580 (Figure 5, Table S2). These individuals were unlikely to be pure Mediterranean, but rather  
581 introgressed individuals resulting from past hybridization with the domestic Atlantic strain at  
582 the beginning of supplementation. Several individuals were also assigned as F2 with  
583 NEWHYBRIDS while they were most likely a result of backcrossing, since their percentage of  
584 domestic Atlantic ancestry and their chromosomal ancestry imbalance were lower than  
585 expected for F2 individuals (Figure 5). This suggests that coupling haplotypic information to  
586 probabilistic model-based methods such as NEWHYBRIDS could greatly improve the detection  
587 of hybrids pedigree in a complex system like this one in the future.

588

### 589 *Timing of gene flow*

590 The use of haplotype information can also allow modeling historical gene flow in  
591 order to date admixture events (Allendorf *et al.*, 2010; Gravel, 2012; Homburger *et al.*, 2015).  
592 Indeed, the length distribution of introgressed haplotypes within a population is a proxy of the  
593 time since introduction (Liang and Nielsen, 2014; Racimo *et al.*, 2015). Because introgressed  
594 haplotypes are progressively broken down into shorter fragments at each generation due to  
595 recombination events, long introgressed tracts denote recent admixtures while short  
596 haplotypes denote more ancient hybridization events (Racimo *et al.*, 2015). For estimating the



597 number of generations since the most intensive introgression of domestic strain into each  
598 river, we choose to use the mode of the distribution of introgressed tracts length instead of the  
599 mean length. Thus this estimation was predominantly based on shorter fragments reflecting  
600 past supplementation. A bias toward the detection of short fragments might have occurred in  
601 our dataset due to the method used for the delimitation of tract junctions that could not be  
602 unambiguously resolved (see methods). Besides, the recombination rate is highly variable  
603 along the genome (Leitwein *et al.* 2017). Although we accounted for such variation using the  
604 first and third quartiles of the observed distribution of recombination rate, the estimated time  
605 in generation is not expected to be precise and remain an approximation that should be  
606 interpreted with caution. In Gravezon and Orb rivers, we found that the number of generations  
607 since the most extensive events of hybridization was greater for the domestic Atlantic strain  
608 than for the domestic Mediterranean strain, revealing a more ancient introgression of  
609 domestic Atlantic alleles which was expected from the known history of introduction.  
610 Conversely, in the Mare river, the introgression of domestic Atlantic alleles was found more  
611 recent than the introgression from the Mediterranean strain. This could denote a recent  
612 undocumented introgression of domestic Atlantic strain into the Mare river. The history of  
613 supplementation in the Orb watershed is not well documented, but according to stocking  
614 practices in the area, the use of the Atlantic domestic strain should be more ancient and  
615 should have stopped since 2004, as observed in the Gravezon and the Orb rivers. However  
616 several pure domestic Atlantic individuals have also been found in Gravezon river, and it is  
617 therefore possible that the Mare river has undergone an unknown recent event of domestic  
618 Atlantic admixture.

619

#### 620 *Implications for brown trout conservation genomics*

621 Genotype data at unlinked makers have been commonly used to assess hybridization  
622 and genome-wide levels of admixture and introgression for a large range of conservation  
623 genomics issues (Hohenlohe *et al.*, 2013; Hassanin, 2015; Lamaze *et al.* 2012; Bradbury *et al.*  
624 2015; Le Moan *et al.* 2016; King *et al.*, 2015; Rougemont *et al.*, 2017). Nevertheless, the use  
625 of a linkage maps for assessing the relative order and linkage disequilibrium among loci, and  
626 the increasing availability of references genome allow to access haplotypic information which

627 has the potential to increase the sensitivity of admixture estimates (Allendorf *et al.*, 2010),  
628 and allow to estimate the time since hybridization (Racimo *et al.*, 2015).

629 In this study, we took advantage of the linkage map available for the brown trout  
630 (Leitwein *et al.* 2017) and the Atlantic salmon reference genome (Lien *et al.* 2016), to assess  
631 introgression at a fine scale level in a complex system, where more than one domestic lineage  
632 has been used for supplementation. As a result, we were able to describe the complex pattern  
633 of admixture and introgression resulting from multiple genetic interactions between wild local  
634 Mediterranean populations and domestic Atlantic and Mediterranean strains (Leitwein *et al.*,  
635 2016). Our approach seems particularly relevant to identify allochthonous and autochthonous  
636 sources of supplementation for a conservation biology perspective, especially when local and  
637 domestic stains are genetically close to each other. In particular, when the development and  
638 prioritization of conservation actions is ruled by the presence of ‘pure’ wild individuals  
639 increasing the value of a stream or a watershed (Hansen and Mensberg 2009), it is often  
640 required to prioritize the identification of pure individuals in the wild. Nonetheless, we show  
641 in this study that the identification of pure individuals was sensitive to the method used and  
642 that no pure individuals likely remains in the studied populations, which is not surprising  
643 considering the history of supplementation. An inference relying on ADMIXTURE alone would  
644 have led to the wrong conclusion that domestic alleles have been totally purged through the  
645 time, which is not consistent with the finding of short domestic tracts in introgressed wild  
646 individuals. The complexity and the diversity of early-generation admixture have also been  
647 described here, without the need for using a priori on particular hybrids classes. Furthermore,  
648 the time since the most important event of supplementation from both domestic strains could  
649 have been estimated for each local population, which is meaningful for decision making in  
650 conservation.

651 Finally, our results showed dramatically different consequences of supplementation on  
652 the polymorphism of admixed populations, with opposite trends between the effect of  
653 introducing domestic Mediterranean or domestic Atlantic strains. Indeed, an increase in  
654 heterozygosity was associated to an increase in domestic Atlantic ancestry, as expected when  
655 mixing two distinct evolutionary lineages (Atlantic and Mediterranean), especially during first  
656 generations of hybridization (Allendorf *et al.*, 2012). This effect is here amplified by the fact  
657 that the Atlantic domestic strain is more genetically variable than the wild Mediterranean  
658 populations. On the contrary, an increase in domestic Mediterranean ancestry was associated

659 to a decrease in heterozygosity (Figure 5), potentially indicating negative consequences  
660 associated with a loss of diversity and/or increased genetic load, as already suspected by  
661 Leitwein *et al.* (2016) because of the low polymorphism observed in the Mediterranean  
662 domestic strain. These observations suggest that the mosaic of individual haplotypic ancestry  
663 should be more thoroughly analyzed in order to better understand how  
664 hybridization/introgression impacts the genomic makeup and potentially the fitness of wild  
665 brown trout populations. An in-depth analysis of the genome-wide landscape of introgression  
666 is now needed to identify genomic regions where introgression is higher, or on the contrary,  
667 lower than expected under neutral introgression. Such approach will be highly informative for  
668 understanding the historical and the selective consequences of introgression (Sankararaman *et*  
669 *al.*, 2014; Racimo *et al.*, 2015). For example, we could detect signatures of adaptive  
670 introgression from the Atlantic domestic lineage into wild Mediterranean populations, or  
671 even, genomic regions that are resistant to gene flow because of negative selection against  
672 deleterious introgression. The detection of genomic region under positive or negative  
673 selection, will be of prime importance for future conservation and management actions  
674 (Allendorf *et al.*, 2001, 2010; Frankham, 2010; Stronen and Paquet, 2013; Garner *et al.*,  
675 2016).

676

677

#### Acknowledgments

678 We thank E. Ravel and people from the Fédération Départementale de la Pêche de l'Hérault  
679 (France) and the Babeau hatchery for their help at several stages of this project. This project  
680 largely benefited from the Montpellier Bioinformatics Biodiversity cluster computing  
681 platform. Presequencing steps necessary for the production of SNP data were performed at the  
682 Genotyping and Sequencing facility of the LabEx CeMEB (Centre Méditerranéen pour  
683 l'Environnement et la Biodiversité, Montpellier), and RAD sequencing was performed at  
684 Montpellier GenomiX facility (Montpellier, France; <http://www.mgx.cnrs.fr/>). M.L. was  
685 partly supported by a grant from LabEx CeMEB.

686

687

#### References

688

- 689 Alexander DH, Novembre J, and Lange K (2009) Fast model-based estimation of ancestry in  
690 unrelated individuals *Genome Res* **19**, 1655–1664.
- 691 Allendorf FW, Hohenlohe PA, and Luikart G (2010) Genomics and the future of conservation  
692 genetics *Nat Rev Genet* **11**, 697–709.
- 693 Allendorf FW, Leary RF, Spruell P, and Wenburg JK (2001) The problems with hybrids:  
694 setting conservation guidelines *Trends Ecol Evol* **16**, 613–622.
- 695 Allendorf FW, Luikart GH, and Aitken SN (2012) *Conservation and the Genetics of*  
696 *Populations* (2 edition). Hoboken: Wiley-Blackwell.
- 697 Almodóvar A, Suárez J, Nicola GG, and Nuevo M (2001) Genetic introgression between wild  
698 and stocked brown trout in the Douro River basin, Spain *J Fish Biol* **59**, 68–74.
- 699 Anderson E (1948) Hybridization of the Habitat *Evolution* **2**, 1–9.
- 700 Anderson E (1953) Introgressive Hybridization *Biol Rev* **28**, 280–307.
- 701 Anderson E (1949) *Introgressive hybridization* New York, J. Wiley.
- 702 Anderson E, and Stebbins GL (1954) Hybridization as an Evolutionary Stimulus *Evolution* **8**,  
703 378–388.
- 704 Anderson E, and Thompson EA (2002) A Model-Based Method for Identifying Species  
705 Hybrids Using Multilocus Genetic Data *Genetics* **160**, 1217–1229.
- 706 Angeloni F, Wagemaker N, Vergeer P, and Ouborg J (2012) Genomic toolboxes for  
707 conservation biologists *Evol Appl* **5**, 130–143.
- 708 Antunes A, Apostolidis A, Berrebi P, Duguid A, Ferguson A, García-Marín JL, ... Koljonen  
709 M-L (1999) *Conservation Genetic Management of Brown Trout (Salmo trutta) in*  
710 *Europe*.
- 711 Arahamian MW, Martin Smith K, McGinnity P, McKelvey S, and Taylor J (2003)  
712 Restocking of salmonids—opportunities and limitations *Fish Res* **62**, 211–227.
- 713 Araki H, and Schmid C (2010) Is hatchery stocking a help or harm?: evidence, limitations and  
714 future directions in ecological and genetic surveys *Aquaculture* **308**, S2–S11.
- 715 Benestan LM, Ferchaud A-L, Hohenlohe PA, Garner BA, Naylor GJP, Baums IB, ... Luikart  
716 G (2016) Conservation genomics of natural and managed populations: building a  
717 conceptual and practical framework *Mol Ecol* **25**, 2967–2977.
- 718 Bernatchez L, and Osinov A (1995) Genetic diversity of trout (genus *Salmo*) from its most  
719 eastern native range based on mitochondrial DNA and nuclear gene variation *Mol*  
720 *Ecol* **4**, 285–298.
- 721 Berrebi P, Poteaux C, Fissier M, and Cattaneo-Berrebi G (2000) Stocking impact and  
722 allozyme diversity in brown trout from Mediterranean southern France *J Fish Biol* **56**,  
723 949–960.
- 724 Berrebi P, and Schikorski D (2017) Suivi génétique 2016 des truites de l’Orb et de la Mare -  
725 Rapport d’analyses ORB8: Etude pour la FD34, Université de Montpellier. 8p.  
726 [https://data.oreme.org/trout/trout\\_report\\_list/report\\_list\\_pub](https://data.oreme.org/trout/trout_report_list/report_list_pub).
- 727 Berthelot C, Brunet F, Chalopin D, Juanchich A, Bernard M, Noël B, ... others (2014) The  
728 rainbow trout genome provides novel insights into evolution after whole-genome  
729 duplication in vertebrates *Nat Commun* **5**.
- 730 Bohling J, Haffray P, and Berrebi P (2016) Genetic diversity and population structure of  
731 domestic brown trout (*Salmo trutta*) in France *Aquaculture* **462**, 1–9.
- 732 Bohling JH (2016) Strategies to address the conservation threats posed by hybridization and  
733 genetic introgression *Biol Conserv* **203**, 321–327.
- 734 Briec MS, Waters CD, Seeb JE, and Naish KA (2014) A dense linkage map for Chinook  
735 salmon (*Oncorhynchus tshawytscha*) reveals variable chromosomal divergence after  
736 an ancestral whole genome duplication event *G3 Genes Genomes Genet* **4**, 447–460.

- 737 Buerkle CA (2005) Maximum-likelihood estimation of a hybrid index based on molecular  
738 markers *Mol Ecol Notes* **5**, 684–687.
- 739 Buerkle CA, and Lexer C (2008) Admixture as the basis for genetic mapping *Trends Ecol*  
740 *Evol* **23**, 686–694.
- 741 Catchen J, Hohenlohe PA, Bassham S, Amores A, and Cresko WA (2013) Stacks: an analysis  
742 tool set for population genomics *Mol Ecol* **22**, 3124–3140.
- 743 Corbett-Detig R, and Nielsen R (2017) A Hidden Markov Model Approach for  
744 Simultaneously Estimating Local Ancestry and Admixture Time Using Next  
745 Generation Sequence Data in Samples of Arbitrary Ploidy *PLOS Genet* **13**, e1006529.
- 746 Danecek P, Auton A, Abecasis G, Albers CA, Banks E, DePristo MA, ... Group 1000  
747 Genomes Project Analysis (2011) The variant call format and VCFtools  
748 *Bioinformatics* **27**, 2156–2158.
- 749 Davidson WS, Koop BF, Jones SJ, Iturra P, Vidal R, Maass A, ... Omholt SW (2010)  
750 Sequencing the genome of the Atlantic salmon (*Salmo salar*) *Genome Biol* **11**, 403.
- 751 Duranton M, Allal F, Fraïsse C, Bierne N, Bonhomme F, and Gagnaire P-A (2017) The origin  
752 and remolding of genomic islands of differentiation in the European sea bass *bioRxiv*  
753 223750.
- 754 Eldridge WH, Myers JM, and Naish KA (2009) Long-term changes in the fine-scale  
755 population structure of coho salmon populations (*Oncorhynchus kisutch*) subject to  
756 extensive supportive breeding *Heredity* **103**, 299–309.
- 757 Elliott JM (1994) *Quantitative Ecology and the Brown Trout*. Oxford University Press, USA.
- 758 Falush D, Stephens M, and Pritchard JK (2003) Inference of population structure using  
759 multilocus genotype data: linked loci and correlated allele frequencies. *Genetics* **164**,  
760 1567–1587.
- 761 Flori L, Thevenon S, Dayo G-K, Senou M, Sylla S, Berthier D, ... Gautier M (2014) Adaptive  
762 admixture in the West African bovine hybrid zone: insight from the Borgou  
763 population *Mol Ecol* **23**, 3241–3257.
- 764 Frankham R (2010) Where are we in conservation genetics and where do we need to go?  
765 *Conserv Genet* **11**, 661–663.
- 766 Fraser DJ (2008) How well can captive breeding programs conserve biodiversity? A review  
767 of salmonids *Evol Appl* **1**, 535–586.
- 768 Gagnaire P-A, Pavey SA, Normandeau E, and Bernatchez L (2013) The Genetic Architecture  
769 of Reproductive Isolation During Speciation-with-Gene-Flow in Lake Whitefish  
770 Species Pairs Assessed by Rad Sequencing *Evolution* **67**, 2483–2497.
- 771 Galaverni M, Caniglia R, Pagani L, Fabbri E, Boattini A, and Randi E (2017) Disentangling  
772 timing of admixture, patterns of introgression and phenotypic indicators in a  
773 hybridizing wolf population *Mol Biol Evol*.
- 774 Garner BA, Hand BK, Amish SJ, Bernatchez L, Foster JT, Miller KM, ... Luikart G (2016)  
775 Genomics in Conservation: Case Studies and Bridging the Gap between Data and  
776 Application *Trends Ecol Evol* **31**, 81–83.
- 777 Glover KA, Solberg MF, McGinnity P, Hindar K, Verspoor E, Coulson MW, ... Svåsand T  
778 (2017) Half a century of genetic interaction between farmed and wild Atlantic salmon:  
779 Status of knowledge and unanswered questions *Fish Fish* n/a-n/a.
- 780 Gompert Z, and Buerkle CA (2013) Analyses of genetic ancestry enable key insights for  
781 molecular ecology *Mol Ecol* **22**, 5278–5294.
- 782 Gompert Z, and Buerkle CA (2016) What, if anything, are hybrids: enduring truths and  
783 challenges associated with population structure and gene flow *Evol Appl* **9**, 909–923.

- 784 Gonen S, Lowe NR, Cezard T, Gharbi K, Bishop SC, and Houston RD (2014) Linkage maps  
785 of the Atlantic salmon (*Salmo salar*) genome derived from RAD sequencing *BMC*  
786 *Genomics* **15**, 1.
- 787 Grabenstein KC, and Taylor SA (2018) Breaking Barriers: Causes, Consequences, and  
788 Experimental Utility of Human-Mediated Hybridization *Trends Ecol Evol* **0**.
- 789 Gravel S (2012) Population Genetics Models of Local Ancestry *Genetics* **191**, 607–619.
- 790 Guan Y (2014) Detecting Structure of Haplotypes and Local Ancestry *Genetics* **196**, 625–  
791 642.
- 792 Hansen MM (2002) Estimating the long-term effects of stocking domesticated trout into wild  
793 brown trout (*Salmo trutta*) populations: an approach using microsatellite DNA  
794 analysis of historical and contemporary samples *Mol Ecol* **11**, 1003–1015.
- 795 Hansen MM, Fraser DJ, Meier K, and Mensberg K-LD (2009) Sixty years of anthropogenic  
796 pressure: a spatio-temporal genetic analysis of brown trout populations subject to  
797 stocking and population declines *Mol Ecol* **18**, 2549–2562.
- 798 Harbicht A, Wilson CC, and Fraser DJ (2014) Does human-induced hybridization have long-  
799 term genetic effects? Empirical testing with domesticated, wild and hybridized fish  
800 populations *Evol Appl* **7**, 1180–1191.
- 801 Harris K, and Nielsen R (2013) Inferring Demographic History from a Spectrum of Shared  
802 Haplotype Lengths *PLOS Genet* **9**, e1003521.
- 803 Hassanin A (2015) The role of Pleistocene glaciations in shaping the evolution of polar and  
804 brown bears. Evidence from a critical review of mitochondrial and nuclear genome  
805 analyses *C R Biol* **338**, 494–501.
- 806 Heiser CB (1951) HYBRIDIZATION IN THE ANNUAL SUNFLOWERS: HELIANTHUS  
807 ANNUUS x H. DEBILIS VAR. CUCUMERIFOLIUS *Evolution* **5**, 42–51.
- 808 Hoffmann A, Griffin P, Dillon S, Catullo R, Rane R, Byrne M, ... Sgrò C (2015) A  
809 framework for incorporating evolutionary genomics into biodiversity conservation and  
810 management *Clim Change Responses* **2**, 1.
- 811 Hohenlohe PA, Day MD, Amish SJ, Miller MR, Kamps-Hughes N, Boyer MC, ... Luikart G  
812 (2013) Genomic patterns of introgression in rainbow and westslope cutthroat trout  
813 illuminated by overlapping paired-end RAD sequencing *Mol Ecol* **22**, 3002–3013.
- 814 Homburger JR, Moreno-Estrada A, Gignoux CR, Nelson D, Sanchez E, Ortiz-Tello P, ...  
815 Bustamante CD (2015) Genomic Insights into the Ancestry and Demographic History  
816 of South America *PLOS Genet* **11**, e1005602.
- 817 Hufford MB, Lubinsky P, Pyhäjärvi T, Devengenzo MT, Ellstrand NC, and Ross-Ibarra J  
818 (2013) The Genomic Signature of Crop-Wild Introgression in Maize *PLOS Genet* **9**,  
819 e1003477.
- 820 Johnson RC, Nelson GW, Zagury J-F, and Winkler CA (2015) ALDsuite: Dense marker  
821 MALD using principal components of ancestral linkage disequilibrium *BMC Genet*  
822 **16**, 23.
- 823 King KC, Stelkens RB, Webster JP, Smith DF, and Brockhurst MA (2015) Hybridization in  
824 Parasites: Consequences for Adaptive Evolution, Pathogenesis, and Public Health in a  
825 Changing World *PLOS Pathog* **11**, e1005098.
- 826 Kohn MH, Murphy WJ, Ostrander EA, and Wayne RK (2006) Genomics and conservation  
827 genetics *Trends Ecol Evol* **21**, 629–637.
- 828 Laikre L, Schwartz MK, Waples RS, Ryman N, Group GW, and others (2010) Compromising  
829 genetic diversity in the wild: unmonitored large-scale release of plants and animals  
830 *Trends Ecol Evol* **25**, 520–529.

- 831 Lamichhaney S, Han F, Webster MT, Andersson L, Grant BR, and Grant PR (2017) Rapid  
832 hybrid speciation in Darwin's finches *Science* eaao4593.
- 833 Larson EL, Andrés JA, Bogdanowicz SM, and Harrison RG (2013) Differential Introgression  
834 in a Mosaic Hybrid Zone Reveals Candidate Barrier Genes *Evolution* **67**, 3653–3661.
- 835 Lawson DJ, Hellenthal G, Myers S, and Falush D (2012) Inference of Population Structure  
836 using Dense Haplotype Data *PLOS Genet* **8**, e1002453.
- 837 Le Cam S, Perrier C, Besnard A-L, Bernatchez L, and Evanno G (2015) Genetic and  
838 phenotypic changes in an Atlantic salmon population supplemented with non-local  
839 individuals: a longitudinal study over 21 years *Proc R Soc B Biol Sci* **282**, 20142765.
- 840 Leitwein M, Gagnaire P-A, Desmarais E, Guendouz S, Rohmer M, Berrebi P, and Guinand B  
841 (2016) Genome-wide nucleotide diversity of hatchery-reared Atlantic and  
842 Mediterranean strains of brown trout *Salmo trutta* compared to wild Mediterranean  
843 populations *J Fish Biol* **89**, 2717–2734.
- 844 Leitwein M, Guinand B, Pouzadoux J, Desmarais E, Berrebi P, and Gagnaire P-A (2017) A  
845 Dense Brown Trout (*Salmo trutta*) Linkage Map Reveals Recent Chromosomal  
846 Rearrangements in the *Salmo* Genus and the Impact of Selection on Linked Neutral  
847 Diversity *G3 Genes Genomes Genet* **7**, 1365–1376.
- 848 Levin DA, Francisco-Ortega J, and Jansen RK (1996) Hybridization and the Extinction of  
849 Rare Plant Species *Conserv Biol* **10**, 10–16.
- 850 Li H, and Durbin R (2010) Fast and accurate long-read alignment with Burrows–Wheeler  
851 transform *Bioinformatics* **26**, 589–595.
- 852 Liang M, and Nielsen R (2014) The lengths of admixture tracts *Genetics* **197**, 953–967.
- 853 Lien S, Gidskehaug L, Moen T, Hayes BJ, Berg PR, Davidson WS, ... Kent MP (2011) A  
854 dense SNP-based linkage map for Atlantic salmon (*Salmo salar*) reveals extended  
855 chromosome homeologies and striking differences in sex-specific recombination  
856 patterns *BMC Genomics* **12**, 615.
- 857 Lien S, Koop BF, Sandve SR, Miller JR, Kent MP, Nome T, ... Davidson WS (2016) The  
858 Atlantic salmon genome provides insights into rediploidization *Nature* **533**, 200–205.
- 859 Liu Y, Nyunoya T, Leng S, Belinsky SA, Tesfaigzi Y, and Bruse S (2013) Softwares and  
860 methods for estimating genetic ancestry in human populations *Hum Genomics* **7**, 1.
- 861 Loh P-R, Lipson M, Patterson N, Moorjani P, Pickrell JK, Reich D, and Berger B (2013)  
862 Inferring Admixture Histories of Human Populations Using Linkage Disequilibrium  
863 *Genetics* **193**, 1233–1254.
- 864 Machordom A, García-Marán JL, Sanz N, Almodovar A, and Pla C (1999) Allozyme  
865 diversity in brown trout (*Salmo trutta*) from Central Spain: Genetic consequences of  
866 restocking *Freshw Biol* **41**, 707–717.
- 867 McGinnity P, Prodöhl P, Ferguson A, Hynes R, Maoiléidigh N ó, Baker N, ... Cross T (2003)  
868 Fitness reduction and potential extinction of wild populations of Atlantic salmon,  
869 *Salmo salar*, as a result of interactions with escaped farm salmon *Proc R Soc Lond B*  
870 *Biol Sci* **270**, 2443–2450.
- 871 McKinney G, Seeb L, Larson W, Gomez-Uchida D, Limborg M, Briec M, ... Seeb J (2015)  
872 An integrated linkage map reveals candidate genes underlying adaptive variation in  
873 Chinook salmon (*Oncorhynchus tshawytscha*) *Mol Ecol Resour* n/a-n/a.
- 874 Medugorac I, Graf A, Grohs C, Rothhammer S, Zagdsuren Y, Gladyr E, ... Capitan A (2017)  
875 Whole-genome analysis of introgressive hybridization and characterization of the  
876 bovine legacy of Mongolian yaks *Nat Genet* **49**, 470–475.

- 877 Muhlfeld CC, Kalinowski ST, McMahon TE, Taper ML, Painter S, Leary RF, and Allendorf  
878 FW (2009) Hybridization rapidly reduces fitness of a native trout in the wild *Biol Lett*  
879 *rsbl*–2009.
- 880 Naish KA, Taylor JE, Levin PS, Quinn TP, Winton JR, Huppert D, and Hilborn R (2007) An  
881 evaluation of the effects of conservation and fishery enhancement hatcheries on wild  
882 populations of salmon *Adv Mar Biol* **53**, 61–194.
- 883 Narum SR, Buerkle CA, Davey JW, Miller MR, and Hohenlohe PA (2013) Genotyping-by-  
884 sequencing in ecological and conservation genomics *Mol Ecol* **22**, 2841–2847.
- 885 Nelson RM, Wallberg A, Simões ZLP, Lawson DJ, and Webster MT (2017) Genomewide  
886 analysis of admixture and adaptation in the Africanized honeybee *Mol Ecol* **7**:1-15.
- 887 Ouborg NJ, Pertoldi C, Loeschcke V, Bijlsma RK, and Hedrick PW (2010) Conservation  
888 genetics in transition to conservation genomics *Trends Genet TIG* **26**, 177–187.
- 889 Ozerov MY, Gross R, Bruneaux M, Vähä J-P, Burimski O, Pukk L, and Vasemägi A (2016)  
890 Genomewide introgressive hybridization patterns in wild Atlantic salmon influenced  
891 by inadvertent gene flow from hatchery releases *Mol Ecol* **25**, 1275–1293.
- 892 Phillips R, and Ráb P (2001) Chromosome evolution in the Salmonidae (Pisces): an update  
893 *Biol Rev Camb Philos Soc* **76**, 1–25.
- 894 Pool JE, and Nielsen R (2009) Inference of historical changes in migration rate from the  
895 lengths of migrant tracts *Genetics* **181**, 711–719.
- 896 Poteaux C, Bonhomme F, and Berrebi P (1999) Microsatellite polymorphism and genetic  
897 impact of restocking in Mediterranean brown trout (*Salmo trutta* L.) *Heredity* **82**, 645–  
898 653.
- 899 Price AL, Tandon A, Patterson N, Barnes KC, Rafaels N, Ruczinski I, ... Myers S (2009)  
900 Sensitive Detection of Chromosomal Segments of Distinct Ancestry in Admixed  
901 Populations *PLOS Genet* **5**, e1000519.
- 902 Primmer CR (2009) From conservation genetics to conservation genomics *Ann N Y Acad Sci*  
903 **1162**, 357–368.
- 904 Racimo F, Sankararaman S, Nielsen R, and Huerta-Sánchez E (2015) Evidence for archaic  
905 adaptive introgression in humans *Nat Rev Genet* **16**, 359–371.
- 906 Randi E (2008) Detecting hybridization between wild species and their domesticated relatives  
907 *Mol Ecol* **17**, 285–293.
- 908 Rhymer JM, and Simberloff D (1996) Extinction by Hybridization and Introgression *Annu*  
909 *Rev Ecol Syst* **27**, 83–109.
- 910 Rougemont Q, Gagnaire P-A, Perrier C, Genthon C, Besnard A-L, Launey S, and Evanno G  
911 (2017) Inferring the demographic history underlying parallel genomic divergence  
912 among pairs of parasitic and nonparasitic lamprey ecotypes *Mol Ecol* **26**, 142–162.
- 913 Runemark A, Trier CN, Eroukhmanoff F, Hermansen JS, Matschiner M, Ravinet M, ... Sætre  
914 G-P (2018) Variation and constraints in hybrid genome formation *Nat Ecol Evol* **2**,  
915 549–556.
- 916 Sankararaman S, Mallick S, Dannemann M, Prüfer K, Kelso J, Pääbo S, ... Reich D (2014)  
917 The genomic landscape of Neanderthal ancestry in present-day humans *Nature* **507**,  
918 354–357.
- 919 Sanz N (2018) Phylogeographic History of Brown Trout In J. Lobón-Cerviá and N. Sanz  
920 (Eds.), *Brown Trout* (pp. 15–63). John Wiley & Sons, Ltd.
- 921 Schumer M, Rosenthal GG, and Andolfatto P (2014) How Common Is Homoploid Hybrid  
922 Speciation? *Evolution* **68**, 1553–1560.



- 923 Seldin MF, Morii T, Collins-Schramm HE, Chima B, Kittles R, Criswell LA, and Li H (2004)  
924 Putative Ancestral Origins of Chromosomal Segments in Individual African  
925 Americans: Implications for Admixture Mapping *Genome Res* **14**, 1076–1084.
- 926 Skaala Ø, Johnsen GH, Lo H avarð, Borgstrøm R, Wennevik V, Hansen MM, ... Barlaup BT  
927 (2014) A conservation plan for Atlantic salmon (*Salmo salar*) and anadromous brown  
928 trout (*Salmo trutta*) in a region with intensive industrial use of aquatic habitats, the  
929 Hardangerfjord, western Norway *Mar Biol Res* **10**, 308–322.
- 930 Stebbins GL (1950) Variation and Evolution in Plants Columbia University Press New York  
931 Google Scholar.
- 932 Steiner CC, Putnam AS, Hoeck PEA, and Ryder OA (2013) Conservation genomics of  
933 threatened animal species *Annu Rev Anim Biosci* **1**, 261–281.
- 934 Stronen AV, and Paquet PC (2013) Perspectives on the conservation of wild hybrids *Biol*  
935 *Conserv* **167**, 390–395.
- 936 Sutherland BJB, Gosselin T, Normandeau E, Lamothe M, Isabel N, Audet C, and Bernatchez  
937 L (2016) Salmonid chromosome evolution as revealed by a novel method for  
938 comparing RADseq linkage maps *Genome Biol Evol* **evw262**.
- 939 Team RC (2014) *R: A language and environment for statistical computing*. R Foundation for  
940 *Statistical Computing, Vienna, Austria. 2013*. ISBN 3-900051-07-0.
- 941 Team RC (2015) *R: A language and environment for statistical computing* [Internet]. Vienna,  
942 Austria: R Foundation for Statistical Computing; 2013 *Doc Free Available Internet*  
943 *Httpwww R-Proj Org*.
- 944 Todesco M, Pascual MA, Owens GL, Ostevik KL, Moyers BT, Hübner S, ... Rieseberg LH  
945 (2016) Hybridization and extinction *Evol Appl* **9**, 892–908.
- 946 Tsai HY, Robledo D, Lowe NR, Bekaert M, Taggart JB, Bron JE, and Houston RD (2016)  
947 Construction and Annotation of a High Density SNP Linkage Map of the Atlantic  
948 Salmon (*Salmo salar*) Genome *G3 GenesGenomesGenetics* **6**, 2173–2179.
- 949 Vasemägi A, Gross R, Paaver T, Koljonen M-L, and Nilsson J (2005) Extensive immigration  
950 from compensatory hatchery releases into wild Atlantic salmon population in the  
951 Baltic sea: spatio-temporal analysis over 18 years *Heredity* **95**, 76–83.
- 952 VonHoldt BM, Kays R, Pollinger JP, and Wayne RK (2016) Admixture mapping identifies  
953 introgressed genomic regions in North American canids *Mol Ecol* **25**, 2443–2453.
- 954 Wall JD, Yang MA, Jay F, Kim SK, Durand EY, Stevison LS, ... Slatkin M (2013) Higher  
955 levels of Neanderthal ancestry in East Asians than in Europeans *Genetics* **194**, 199–  
956 209.
- 957 Wang H, Vieira FG, Crawford JE, Chu C, and Nielsen R (2017) Asian wild rice is a hybrid  
958 swarm with extensive gene flow and feralization from domesticated rice *Genome Res*  
959 **27**, 1029–1038.
- 960 Waples RS (1991) Genetic interactions between hatchery and wild salmonids: lessons from  
961 the Pacific Northwest *Can J Fish Aquat Sci* **48**, 124–133.
- 962 Wayne RK, and Shaffer HB (2016) Hybridization and endangered species protection in the  
963 molecular era *Mol Ecol* **25**, 2680–2689.
- 964 Whitney KD, Broman KW, Kane NC, Hovick SM, Randell RA, and Rieseberg LH (2015)  
965 Quantitative trait locus mapping identifies candidate alleles involved in adaptive  
966 introgression and range expansion in a wild sunflower *Mol Ecol* **24**, 2194–2211.
- 967 Wiegand KM (1935) A Taxonomist's Experience with Hybrids in the Wild *Science* **81**, 161–  
968 166.

- 969 Wielstra B, Burke T, Butlin RK, and Arntzen JW (2017) A signature of dynamic  
970 biogeography: enclaves indicate past species replacement *Proc R Soc B* **284**,  
971 20172014.
- 972 Yakimowski SB, and Rieseberg LH (2014) The role of homoploid hybridization in evolution:  
973 A century of studies synthesizing genetics and ecology *Am J Bot* **101**, 1247–1258.
- 974 Zhou Y, Qiu H, and Xu S (2017) Modeling Continuous Admixture Using Admixture-Induced  
975 Linkage Disequilibrium *Sci Rep* **7**.

976

977

978

#### 979 Data Accessibility

980 Supplemental Material, Table S1 contains NEWHYBRIDS results with sample ID and priors.  
981 Table S2 contains sample ID, the corresponding population, the mean percentage of Atlantic  
982 ancestry retrieved with ELAI and ADMIXTURE, the mean number and the mean length of  
983 introgressed Atlantic and domestic Mediterranean haplotypes as well as the pedigree  
984 inferred with NEWHYBRIDS.

985 Raw demultiplexed sequence reads by individuals (fastq) are available at NCBI Short Read  
986 Archive under the study accession SRP136716 with one file per paired-end reads Sample.1.fq  
987 and Sample.2.fq and one file per unpaired reads Sample.rem.fq.

988

#### 989 Author Contributions

990 M.L and P.A.G conceived and designed the analyses. M.L performed the lab work, the  
991 analyses and wrote the manuscript. B.G and P.B supervised the research. All co-authors  
992 critically revised the manuscript and approved the final version to be published.
